# Supplementary material for: Enantioselective cyclizations and cyclization cascades of samarium ketyl radicals
Source: Springer Nature journal article supplement (doi:10.1038/nchem.2841), 2017-08-07
Supplement: 41557_2017_BFnchem2841_MOESM29_ESM.mol [file 41557_2017_BFnchem2841_MOESM29_ESM.mol]

nchem.2841-comp2g.mol
  ChemDraw07201722042D

 18 18  0  0  1  0  0  0  0  0999 V2000
   -0.4481   -0.5598    0.0000 C   0  0  0  0  0  0  0  0  0  0  0  0
   -1.2759   -0.5598    0.0000 C   0  0  0  0  0  0  0  0  0  0  0  0
   -1.5317   -1.3470    0.0000 C   0  0  0  0  0  0  0  0  0  0  0  0
   -0.8620   -1.8336    0.0000 C   0  0  0  0  0  0  0  0  0  0  0  0
   -0.1923   -1.3470    0.0000 C   0  0  0  0  0  0  0  0  0  0  0  0
   -1.4902    0.2398    0.0000 O   0  0  0  0  0  0  0  0  0  0  0  0
   -0.2339    0.2398    0.0000 C   0  0  0  0  0  0  0  0  0  0  0  0
   -0.8172    0.8231    0.0000 O   0  0  0  0  0  0  0  0  0  0  0  0
    0.3514   -0.3455    0.0000 C   0  0  0  0  0  0  0  0  0  0  0  0
    0.9356   -0.9279    0.0000 C   0  0  0  0  0  0  0  0  0  0  0  0
    1.7321   -0.7132    0.0000 C   0  0  0  0  0  0  0  0  0  0  0  0
    2.3163   -1.2956    0.0000 C   0  0  0  0  0  0  0  0  0  0  0  0
    0.5629    0.4533    0.0000 O   0  0  0  0  0  0  0  0  0  0  0  0
    0.7764    1.2502    0.0000 C   0  0  0  0  0  0  0  0  0  0  0  0
    0.1931    1.8336    0.0000 C   0  0  0  0  0  0  0  0  0  0  0  0
    1.5733    1.4637    0.0000 C   0  0  0  0  0  0  0  0  0  0  0  0
   -2.0755   -0.3455    0.0000 C   0  0  0  0  0  0  0  0  0  0  0  0
   -2.3163   -1.6019    0.0000 C   0  0  0  0  0  0  0  0  0  0  0  0
 14 15  1  0      
 14 16  1  0      
 13 14  1  0      
  7 13  1  0      
  2 17  1  6      
  3 18  1  6      
  1  2  1  0      
  2  3  1  0      
  3  4  1  0      
  4  5  1  0      
  5  1  1  0      
  2  6  1  1      
  1  7  1  1      
  7  8  2  0      
  1  9  1  6      
  9 10  1  0      
 10 11  1  0      
 11 12  2  0      
M  STY  1   1 SUP
M  SLB  1   1   1
M  SAL   1  4  13  14  15  16
M  SBL   1  1   4
M  SMT   1 Oi-Pr
M  SBV   1   4   -0.7968   -0.2135
M  STY  1   2 SUP
M  SLB  1   2   2
M  SAL   2  1  17
M  SBL   2  1   5
M  SMT   2 ^Me
M  SBV   2   5    0.7996   -0.2142
M  STY  1   3 SUP
M  SLB  1   3   3
M  SAL   3  1  18
M  SBL   3  1   6
M  SMT   3 ^Me
M  SBV   3   6    0.7845    0.2549
M  END
